# Supplementary material
Source: MDPI journal article supplement (https://www.mdpi.com/2227-9040/10/12/540)
Supplement: s1 [file s1]

Archive with 2 entries (2 files):
- chemosensors-2060346-supplementary.pdf
- Video S1-The compact light screening membrane operation.mp4
