# Supplementary material
Source: MDPI journal article supplement (https://www.mdpi.com/2227-9040/10/12/540)
Supplement: s1 [file s1 › chemosensors-2060346-supplementary.pdf]

# **Virtual filter membranes in a microfluidic system for sorting and separating size-based micro polystyrene beads by illumination intensity design in optically induced dielectrophoresis (ODEP)**

Chia-Ming Yang<sup>1,2,3,4,5</sup>, Ai-Yun Wu<sup>6</sup>, Jian-Cyun Yu<sup>6</sup>, Po-Yu Chu<sup>7</sup>, Chia-Hsun Hsieh<sup>8,9</sup>, Min-Hsien Wu<sup>6,7,8,9,10,\*</sup>

<sup>1</sup> Department of Electronic Engineering, Chang Gung University, Taoyuan City 33302, Taiwan

<sup>2</sup> Institute of Electro-Optical Engineering, Chang Gung University, Taoyuan City 33302, Taiwan

<sup>3</sup> Biosensor Group, Biomedical Engineering Research Center, Chang Gung University, Taoyuan City 33302, Taiwan

<sup>4</sup> Department of Neurosurgery, Chang Gung Memorial Hospital at Linkou, Taoyuan City 33302, Taiwan

<sup>5</sup> Department of Materials Engineering, Ming Chi University of Technology, New Taipei City 243303, Taiwan

<sup>6</sup> Graduate Institute of Biomedical Engineering, Chang Gung University, Taoyuan City 33302, Taiwan

<sup>7</sup> Ph.D. Program in Biomedical Engineering, Chang Gung University, Taoyuan City 33302, Taiwan

<sup>8</sup> Division of Hematology/Oncology, Department of Internal Medicine, Chang Gung Memorial Hospital at Linkou, Taoyuan City 33302, Taiwan

<sup>9</sup> Division of Hematology/Oncology, Department of Internal Medicine, New Taipei Municipal Hospital, New Taipei City 23652, Taiwan

<sup>10</sup> Department of Chemical Engineering, Ming Chi University of Technology, New Taipei City 243303, Taiwan

\* Corresponding author: Prof. Min-Hsien Wu

E-mail: mhwu@mail.cgu.edu.tw

Tel.: +886-3-2118800 ext. 3599

Fax: +886-3-2118668

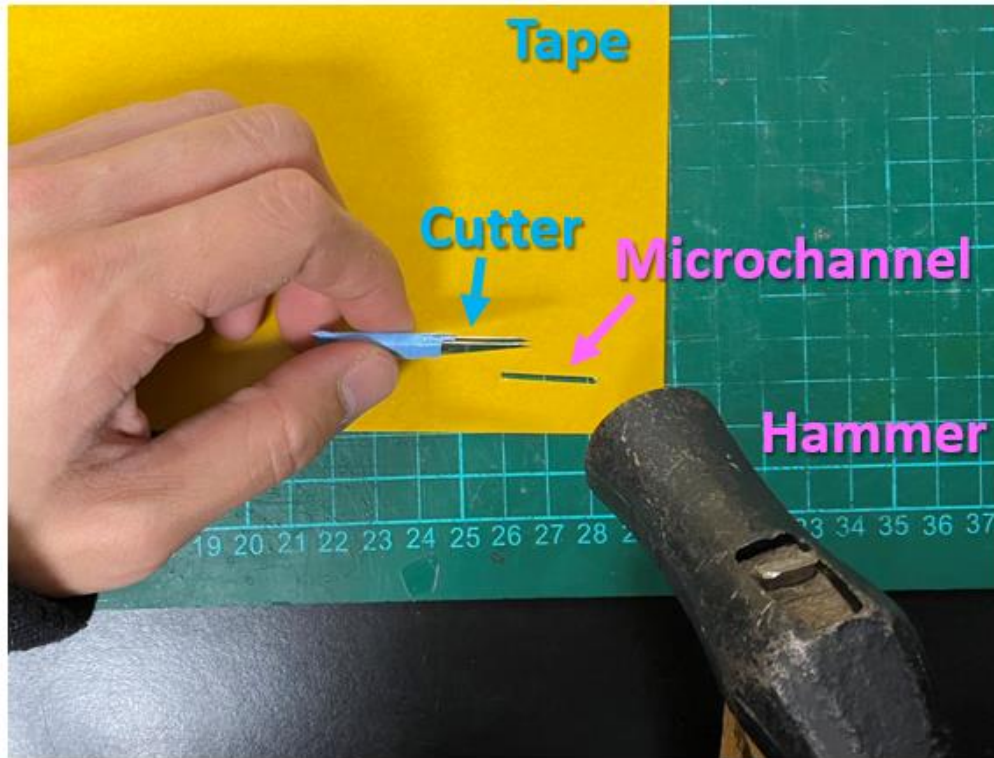

**Figure S1** The picture of microchannel fabricated using manual cutting with a custom-made metal mold in double-sided adhesive tape.

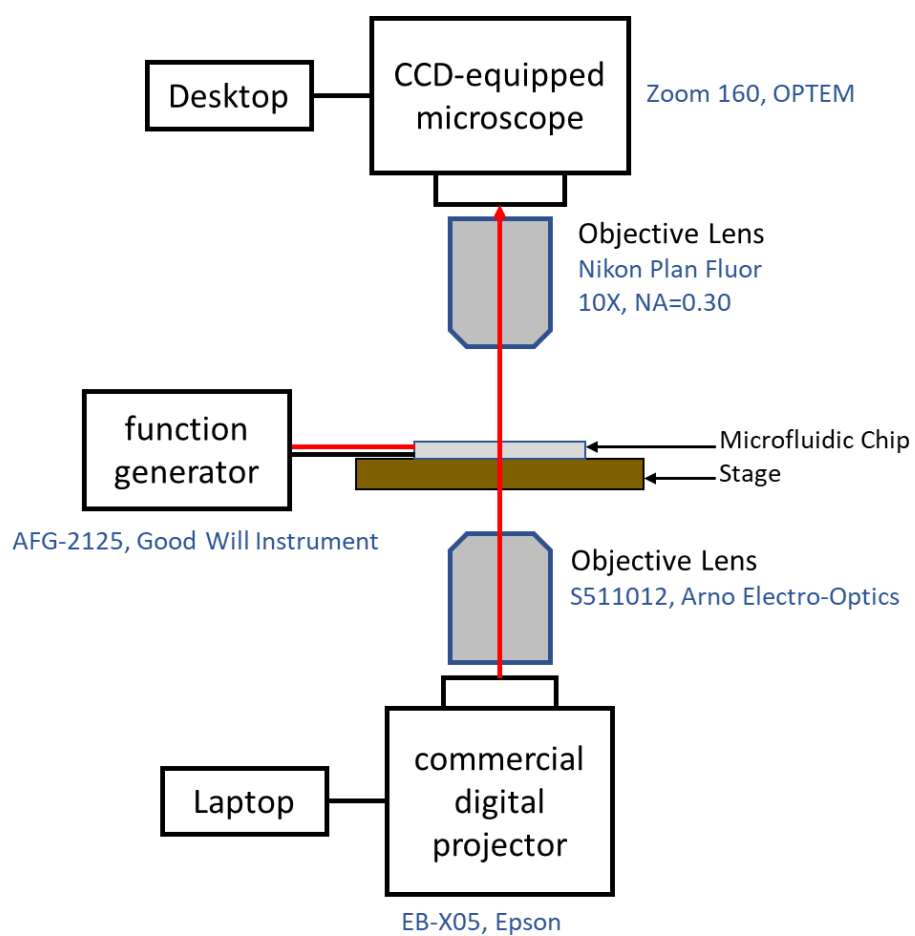

**Figure S2** The schematic plot of optical setup including the optical path and objective lens fixed in the projector.

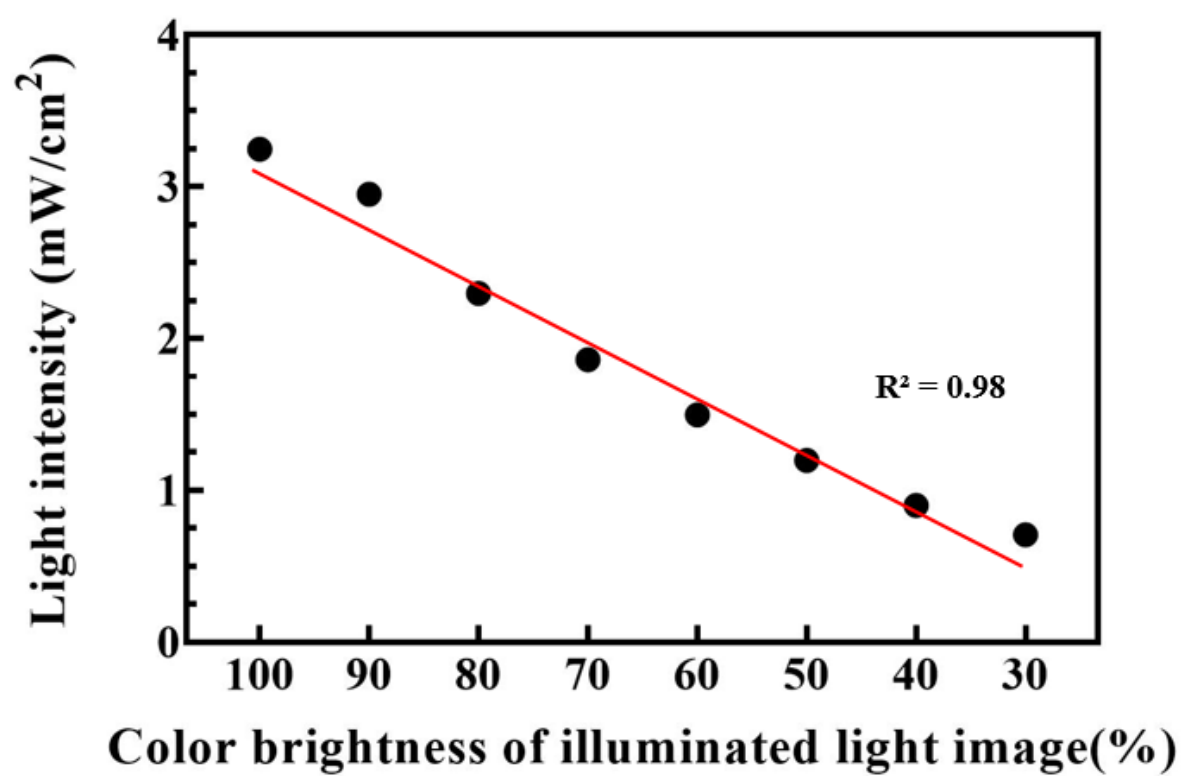

**Figure S3** Light intensity versus the setting of color brightness in the PowerPoint file.

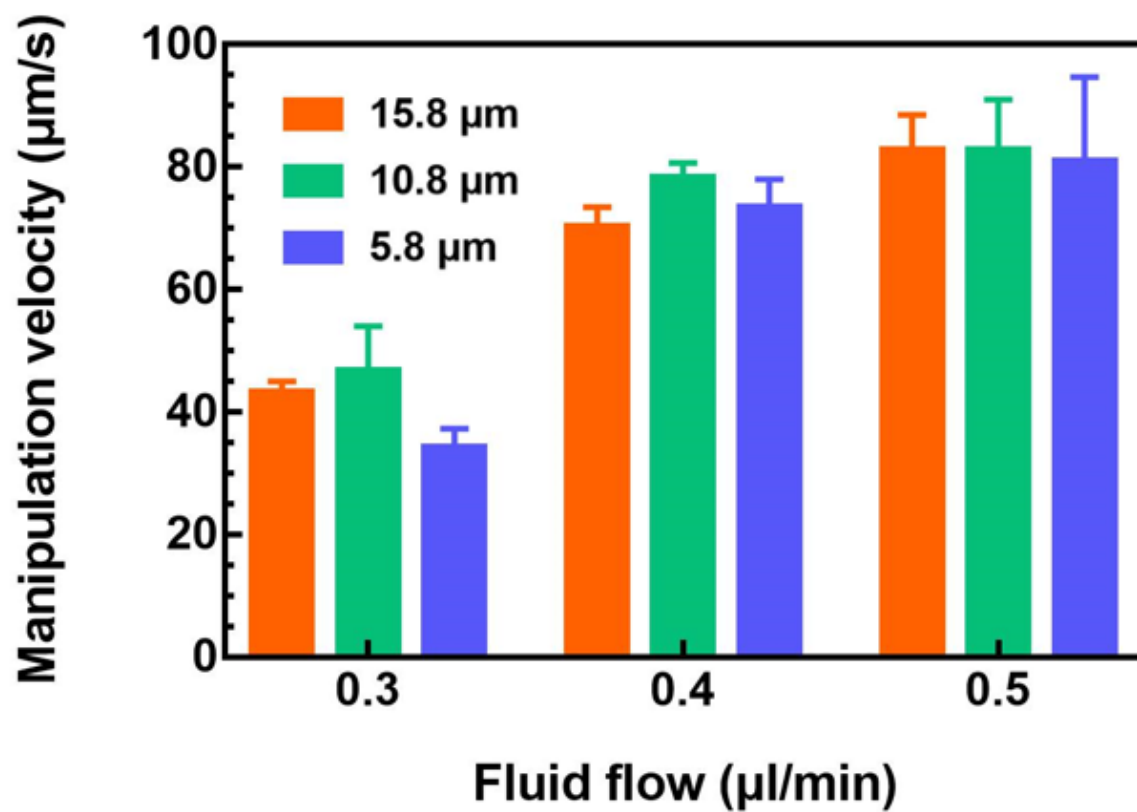

**Figure S4** The actual velocity of three types of PS microparticles versus the fluid rate supplied by the syringe pump.
